# Supplementary material for: Long-Term Survival Prediction Model for Elderly Community Members Using a Deep Learning Method
Source: MDPI journal article supplement (doi:10.3390/geriatrics8050105), 2023-10-23
Supplement: s1 [file s1]

**Supplementary Table S1.** Components of Deficit-Accumulation Frailty Index

| Components                                          | Definition                                                                                                                    | Data Source and Measurement | Scoring                                                                              |
|-----------------------------------------------------|-------------------------------------------------------------------------------------------------------------------------------|-----------------------------|--------------------------------------------------------------------------------------|
| <b>Medical history in the past year</b>             |                                                                                                                               |                             |                                                                                      |
| Dysuria                                             | Do you have dysuria?                                                                                                          | Self-report                 | No (0)<br>Yes (1)                                                                    |
| Fall                                                | Have you fallen in the past 6 months?                                                                                         | Self-report                 | No (0)<br>Yes (1)                                                                    |
| Gait disorder                                       | Clinical observation of gait disorder                                                                                         | Clinical observation        | No (0)<br>Yes (1)                                                                    |
| Hearing impairment                                  | Using pure-tone audiometry or whispered voice test (1) Pure-tone audiometry:                                                  | Objective measurement       | No (0)<br>Yes (1)                                                                    |
| Hypertension                                        | 'H35031', 'H35032', 'H35033', 'H35039', 'I10', 'I110', 'I119', 'I12', 'I130', 'I1310', 'I1311', 'I132', 'I15', 'I674', 'N262' | Claims Data                 | No (0)<br>Yes (1)                                                                    |
| Stroke                                              | 'G45', 'G46', 'I60', 'I61', 'I62', 'I63', 'I64', 'I65', 'I66', 'I67', 'I68', 'I69'                                            | Claims Data                 | No (0)<br>Yes (1)                                                                    |
| Vision impairment                                   | Visual acuity testing                                                                                                         | Objective measurement       | No trouble (0)<br>Blindness in one eye (0.5)<br>Blindness in both eyes (1)           |
| <b>Biometric or laboratory measures</b>             |                                                                                                                               |                             |                                                                                      |
| Alanine aminotransferase level, IU/L <sup>a</sup>   |                                                                                                                               | Laboratory test             | ≤35 (0)<br>36-45 (0.5)<br>≥46 (1)                                                    |
| Body mass index, kg/m <sup>2</sup> , or weight loss |                                                                                                                               | Objective measurement       | 18.5 to 24.9 (0)<br>25.0 to 29.9 (0.5)<br>≥30 or ≤18.5 or weight loss 5% or more per |

| Components                                            | Definition | Data Source and Measurement | Scoring                                                                                                            |
|-------------------------------------------------------|------------|-----------------------------|--------------------------------------------------------------------------------------------------------------------|
| Bone mineral density (T-score) <sup>b</sup>           |            | Diagnostic test             | year (1)<br>≥ -1.0 (0)<br>-2.4 to -1.1 (0.5)<br>≤ -2.5 (1)                                                         |
| Estimated GFR, ml/min/1.73m <sup>2</sup> <sup>c</sup> |            | Laboratory test             | ≥ 60 (0)<br>30 to 59 (0.5)<br>≤ 30 (1)                                                                             |
| Estimated GFR, ml/min/1.73m <sup>2</sup>              |            | Laboratory test             | ≤ 99 (0)<br>100 to 125 (0.5)<br>≥ 126 (1)                                                                          |
| Hemoglobin level, g/dL <sup>d</sup>                   |            | Laboratory test             | Men:<br>≥ 13.0 (0)<br>12.0 to 12.9 (0.5)<br>≤ 11.9 (1)<br>Women:<br>≥ 12.0 (0)<br>11.0 to 11.9 (0.5)<br>≤ 10.9 (1) |
| Systolic blood pressure, mmHg                         |            | Objective measurement       | ≤ 119 (0)<br>120 to 139 (0.5)<br>≥ 140 (1)                                                                         |
| Total cholesterol, mg/dL <sup>e</sup>                 |            | Laboratory test             | ≤ 199 (0)<br>200-239 (0.5)<br>≥ 240 (1)                                                                            |
| <b>Physical health</b>                                |            |                             |                                                                                                                    |
| Physical activity, MET-minutes/week                   |            | Self-report                 | ≥ 1,017 (0)<br>558 to 1,016 (0.3)<br>1 to 557 (0.6)                                                                |

| Components                                                                                 | Definition | Data Source and Measurement | Scoring                                         |
|--------------------------------------------------------------------------------------------|------------|-----------------------------|-------------------------------------------------|
| 3-m timed-up-and-go test, seconds                                                          |            | Objective test              | 0 (1)<br>≤ 10 (0)<br>11 to 19 (0.5)<br>≥ 20 (1) |
| <b>Psychological health</b>                                                                |            |                             |                                                 |
| Have you dropped many of your activity or interests?                                       |            | Self-report                 | No (0)<br>Yes (1)                               |
| Do you feel worthless the way you are now?                                                 |            | Self-report                 | No (0)<br>Yes (1)                               |
| Do you feel that your situation is hopeless?                                               |            | Self-report                 | No (0)<br>Yes (1)                               |
| Do you think your memory is inferior to your friends or colleagues?                        |            | Self-report                 | No trouble (0)<br>Some (0.5)<br>A lot (1)       |
| Do you think your memory has worsened over the last year?                                  |            | Self-report                 | No trouble (0)<br>Some (0.5)<br>A lot (1)       |
| Are there times when you feel memory is an impediment when doing important things?         |            | Self-report                 | No trouble (0)<br>Some (0.5)<br>A lot (1)       |
| Do others know that your memory has worsened?                                              |            | Self-report                 | No trouble (0)<br>Some (0.5)<br>A lot (1)       |
| Do you think that, when performing daily activities, you have become clumsier than before? |            | Self-report                 | No trouble (0)<br>Some (0.5)<br>A lot (1)       |
| <b>Disability</b>                                                                          |            |                             |                                                 |
| Do you take a bath or shower without assistance?                                           |            | Self-report                 | No (0)<br>Yes (1)                               |
| Do you get dressed without assistance?                                                     |            | Self-report                 | No (0)<br>Yes (1)                               |

| Components                                                                                                                     | Definition | Data Source and Measurement | Scoring |
|--------------------------------------------------------------------------------------------------------------------------------|------------|-----------------------------|---------|
| If a meal is prepared, do you eat without assistance?                                                                          |            | Self-report                 | No (0)  |
|                                                                                                                                |            |                             | Yes (1) |
| Do you get to the toilet without assistance?                                                                                   |            | Self-report                 | No (0)  |
|                                                                                                                                |            |                             | Yes (1) |
| Do you prepare your own meals?                                                                                                 |            | Self-report                 | No (0)  |
|                                                                                                                                |            |                             | Yes (1) |
| Do you get to places out of walking distance, such as shops, neighbors, hospitals, and government offices, without assistance? |            | Self-report                 | No (0)  |
|                                                                                                                                |            |                             | Yes (1) |

Abbreviations: GFR, glomerular filtration unite; MET, metabolic equivalent for task.

<sup>a</sup> To convert to  $\mu\text{kat/L}$ , multiply by 0.0167.

<sup>b</sup> Bone mineral density was only measured for women.

<sup>c</sup> To convert to  $\text{mmol/L}$ , multiply by 0.0555.

<sup>d</sup> To convert to  $\text{g/L}$ , multiply by 10.0.

<sup>e</sup> To convert to  $\text{mmol/L}$ , multiply by 0.0259.
